# Supplementary material
Source: Springer Nature journal article supplement (https://www.springermedizin.de/resource/supplementary/13054_2007_6312_MOESM4_ESM.pdf/9727180)

## Propensity model for use of drotrecogin alfa (activated)

| Factors related to the decision to use DrotAA |                                 | Odds ratio<br>(95% CI) | p-value |
|-----------------------------------------------|---------------------------------|------------------------|---------|
| <b>Unit/time factors</b>                      |                                 |                        |         |
| Local approval for DrotAA                     |                                 | 3.78 (2.67 – 5.34)     | < 0.001 |
| NICE appraisal                                |                                 | 0.92 (0.79 – 1.08)     | 0.306   |
| Hospital type                                 | University                      | 1                      | 0.063   |
|                                               | University affiliated           | 0.96 (0.67 – 1.40)     |         |
|                                               | Non-university                  | 0.66 (0.48 – 0.90)     |         |
| Number of beds in unit                        |                                 | 0.96 (0.92 – 1.01)     | 0.132   |
| <b>Patient factors</b>                        |                                 |                        |         |
| Age                                           |                                 | Non-linear*            | < 0.001 |
| ICNARC physiology score                       |                                 | Non-linear*            | < 0.001 |
| Sex (male)                                    |                                 | 0.84 (0.73 – 0.96)     | 0.009   |
| Source                                        | A&E or other hospital           | 1                      | 0.006   |
|                                               | ICU or HDU                      | 1.00 (0.78 – 1.29)     |         |
|                                               | Theatre – elective              | 0.88 (0.55 – 1.40)     |         |
|                                               | Theatre – emergency             | 1.26 (0.90 – 1.77)     |         |
|                                               | Ward or intermediate care area  | 0.77 (0.64 – 0.93)     |         |
| Organ systems failing                         | Cardiovascular                  | 4.44 (2.26 – 8.72)     | < 0.001 |
|                                               | Respiratory                     | 1.89 (1.45 – 2.45)     | < 0.001 |
|                                               | Renal                           | 1.08 (0.91 – 1.27)     | 0.372   |
|                                               | Haematological                  | 0.91 (0.76 – 1.10)     | 0.334   |
|                                               | Metabolic acidosis              | 2.22 (1.86 – 2.66)     | < 0.001 |
| Severe chronic past medical history           | Liver                           | 0.19 (0.09 – 0.37)     | < 0.001 |
|                                               | Cardiovascular                  | 0.28 (0.11 – 0.71)     | 0.007   |
|                                               | Respiratory                     | 0.54 (0.34 – 0.85)     | 0.008   |
|                                               | Renal                           | 0.32 (0.17 – 0.58)     | < 0.001 |
| Primary reason for admission                  | Immuno-compromised              | 0.59 (0.45 – 0.76)     | < 0.001 |
|                                               | Cardiovascular                  | 1                      | < 0.001 |
|                                               | Respiratory (non-surgical)      | 0.89 (0.72 – 1.09)     |         |
|                                               | Respiratory (surgical)          | 0.73 (0.40 – 1.34)     |         |
|                                               | Neurological (non-surgical)     | 0.58 (0.37 – 0.91)     |         |
|                                               | Neurological (surgical)         | 0.29 (0.04 – 2.17)     |         |
|                                               | Gastrointestinal (non-surgical) | 0.80 (0.59 – 1.09)     |         |
|                                               | Gastrointestinal (surgical)     | 0.74 (0.54 – 1.02)     |         |
|                                               | Genitourinary (non-surgical)    | 0.71 (0.49 – 1.02)     |         |
|                                               | Genitourinary (surgical)        | 0.82 (0.39 – 1.72)     |         |
|                                               | Endocrine                       | 0.18 (0.08 – 0.40)     |         |
|                                               | Haematological (non-surgical)   | 1.89 (1.41 – 2.55)     |         |
|                                               | Haematological (surgical)       | 1.93 (0.96 – 3.88)     |         |
|                                               | Musculoskeletal (non-surgical)  | 0.17 (0.02 – 1.25)     |         |
|                                               | Musculoskeletal (surgical)      | 0.37 (0.08 – 1.63)     |         |
|                                               | Dermatological (non-surgical)   | 0.55 (0.16 – 1.88)     |         |
| Dermatological (surgical)                     | 1.00 (0.41 – 2.41)              |                        |         |

\* Fitted with restricted cubic splines – see separate plots

**Non-linear relationships for age and ICNARC physiology score**

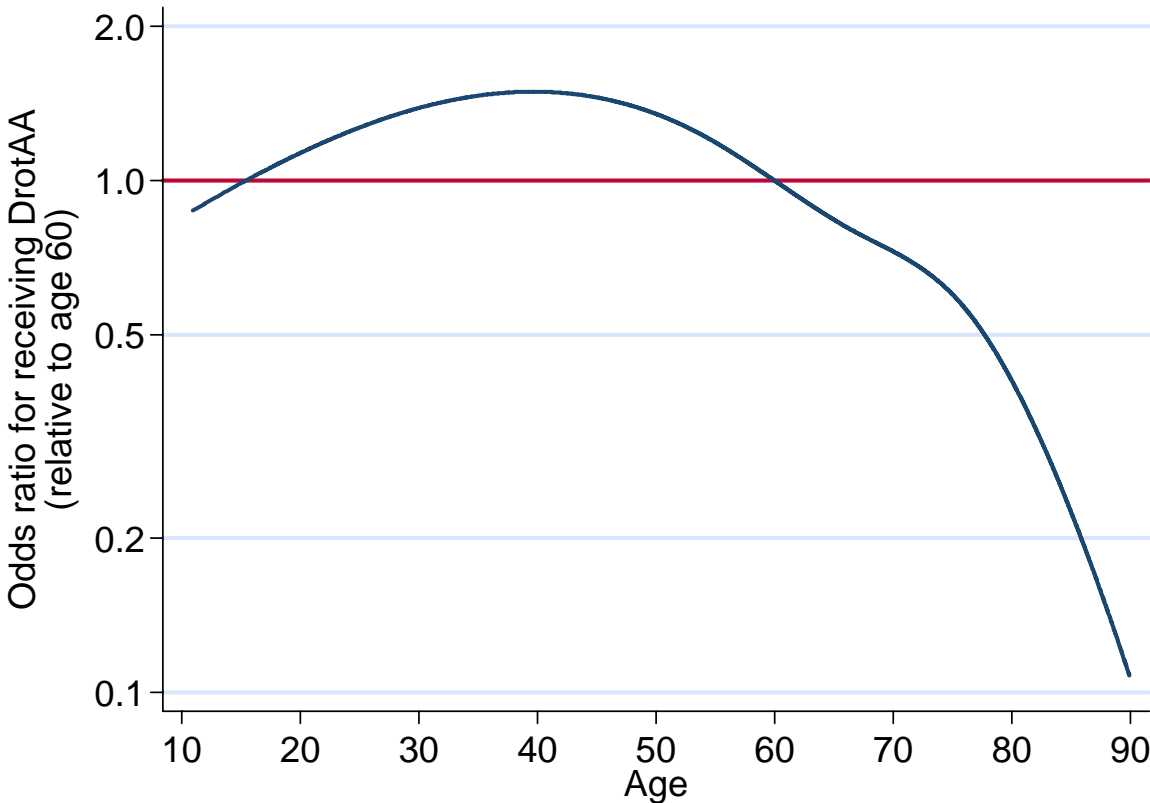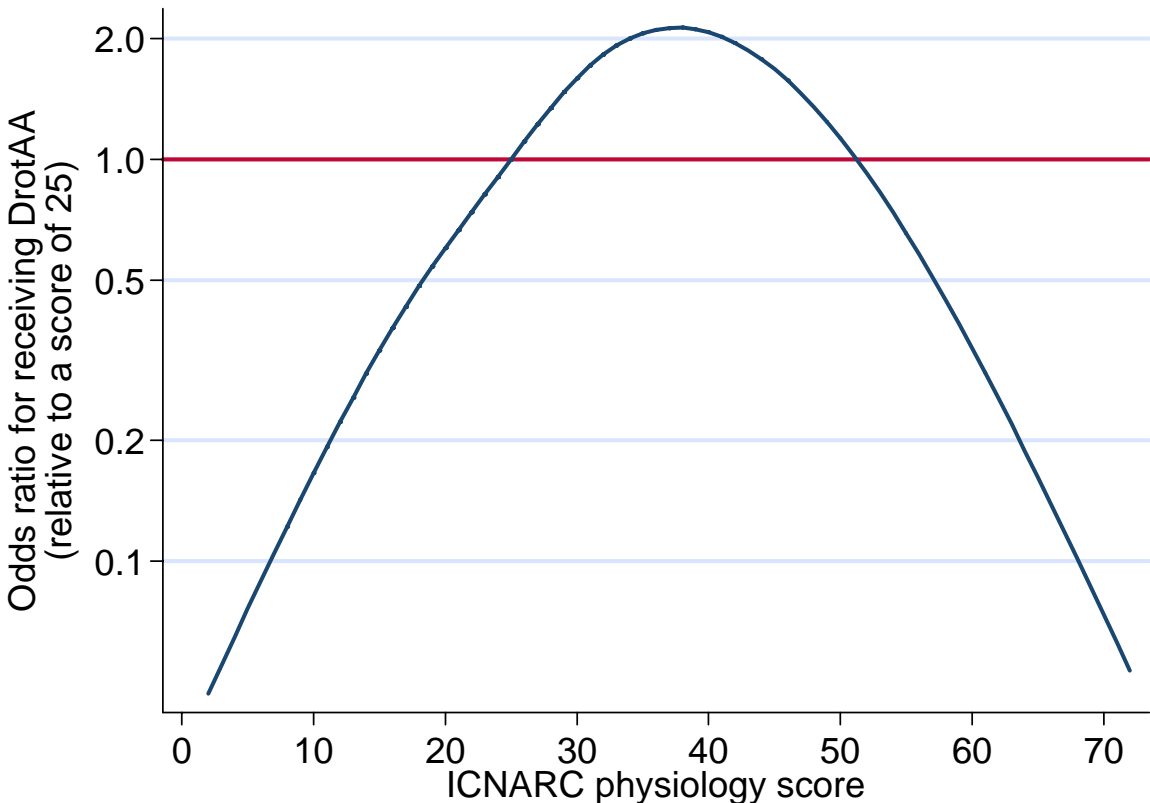

Supplement: MOESM4 [file 9727180]
